# Supplementary material for: Unraveling the Phase Transition Behavior of MgMn2O4 Electrodes for Their Use in Rechargeable Magnesium Batteries
Source: MDPI journal article supplement (doi:10.3390/ma16155402), 2023-08-01
Supplement: s1 [file s1]

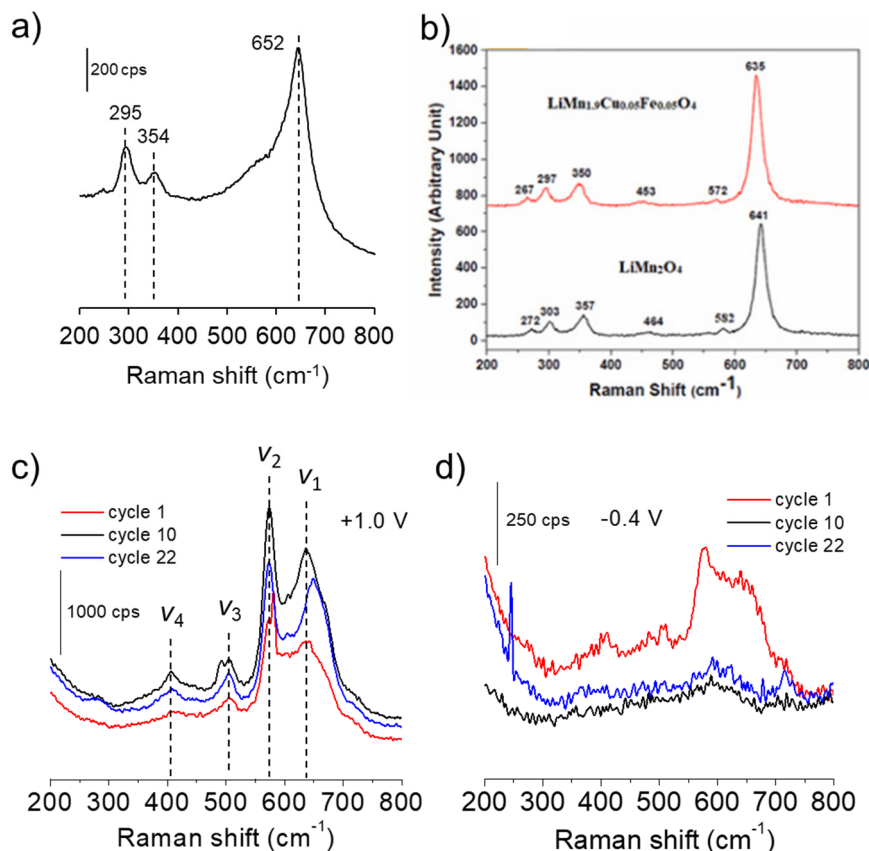

**Figure S1.** a) Raman spectrum for the as-prepared  $\text{MgMn}_2\text{O}_4$  powder; b) Raman spectrum reported for  $\text{LiMn}_2\text{O}_4$  and  $\text{LiMn}_{1.9}\text{Cu}_{0.05}\text{Fe}_{0.05}\text{O}_4$  reproduced with permission from *Results in Materials*, vol. 21, Taddesse, P.; Gebrekiros, H.; Semu, G.; Duressa, M.; Chemedda, Y.C.; Murali, N.; Babu, K.V. Investigation of Structural, Vibrational Spectroscopic and Properties Study of  $\text{LiMn}_2\text{O}_4$  and  $\text{LiMn}_{1.9}\text{Cu}_{0.05}\text{Fe}_{0.05}\text{O}_4$  Cathode Materials, 100224, Copyright Elsevier (2021); c) and d) Raman spectrum evolution with the number of voltammetric cycles for a  $\text{MgMn}_2\text{O}_4$  electrode in 1.0 M  $\text{Mg}(\text{NO}_3)_2$  at 1.0 V (oxidized, charged) and -0.4 (reduced, discharged), respectively. Potentials are referred to a  $\text{Ag}/\text{AgCl}/\text{KCl}$  (3 M) electrode.

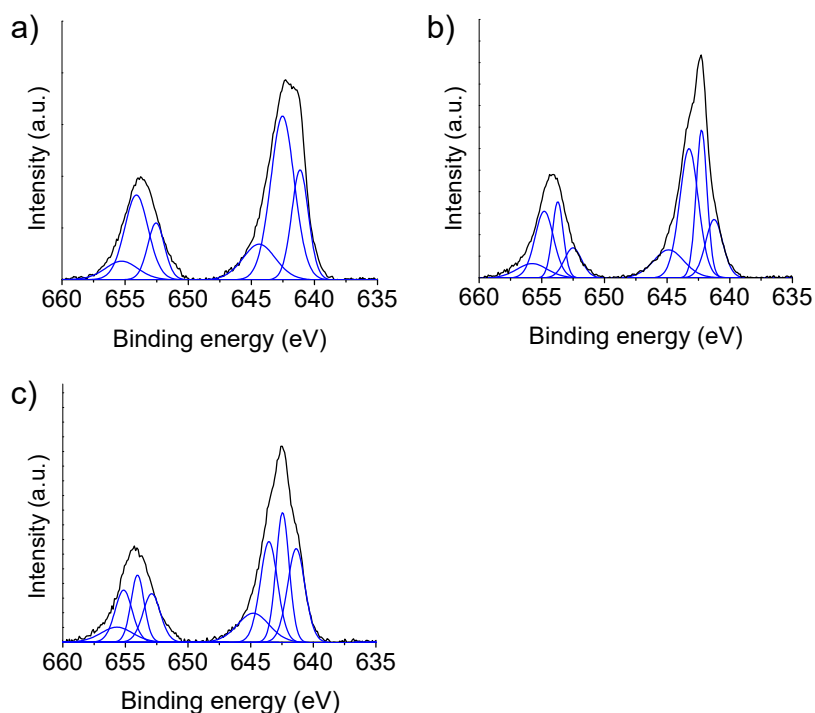

**Figure S2.** XPS deconvolution analysis of Mn 2p of  $\text{MgMn}_2\text{O}_4$  for different states of charge. a)  $\text{MgMn}_2\text{O}_4$  freshly prepared. b) Oxidized at 1.0 V and c) reduced at -0.7 V in 1.0 M  $\text{Mg}(\text{NO}_3)_2$  after 15 successive cycles at  $5 \text{ mV s}^{-1}$ .

**Table S1.** XPS Mn  $2p_{3/2}$  spectral fitting parameters: binding energy (eV), area of each contribution and percentage of total area.

|                                                  |                                          | Mn(III) |        | Mn(IV) |        |
|--------------------------------------------------|------------------------------------------|---------|--------|--------|--------|
| Mg <sub>0.8</sub> Mn <sub>2</sub> O <sub>4</sub> | Mn 2p peak (eV)                          | 641.14  | 642.53 | 644.38 | 646.53 |
|                                                  | Area (arb. units)                        | 69.24   | 145.57 | 43.95  | 0      |
|                                                  | Total area for each species (arb. units) | 214.81  |        | 43.95  |        |
|                                                  | Total area (arb. units)                  | 258.76  |        |        |        |
|                                                  | Area (%)                                 | 83.02   |        | 16.98  |        |
| Oxidized spinel                                  | Mn 2p peak (eV)                          | 641.25  | 642.25 | 643.25 | 644.88 |
|                                                  | Area (arb. units)                        | 45.78   | 72.69  | 109.52 | 38.89  |
|                                                  | Total area for each species (arb. units) | 118.47  |        | 148.41 |        |
|                                                  | Total area (arb. units)                  | 266.88  |        |        |        |
|                                                  | Area (%)                                 | 44.39   |        | 55.61  |        |
| Reduced spinel                                   | Mn 2p peak (eV)                          | 641.36  | 642.45 | 643.54 | 644.79 |
|                                                  | Area (arb. units)                        | 54.82   | 56.61  | 58.16  | 30.99  |
|                                                  | Total area for each species (arb. units) | 111.43  |        | 89.15  |        |
|                                                  | Total area (arb. units)                  | 200.58  |        |        |        |
|                                                  | Area (%)                                 | 55.56   |        | 44.44  |        |

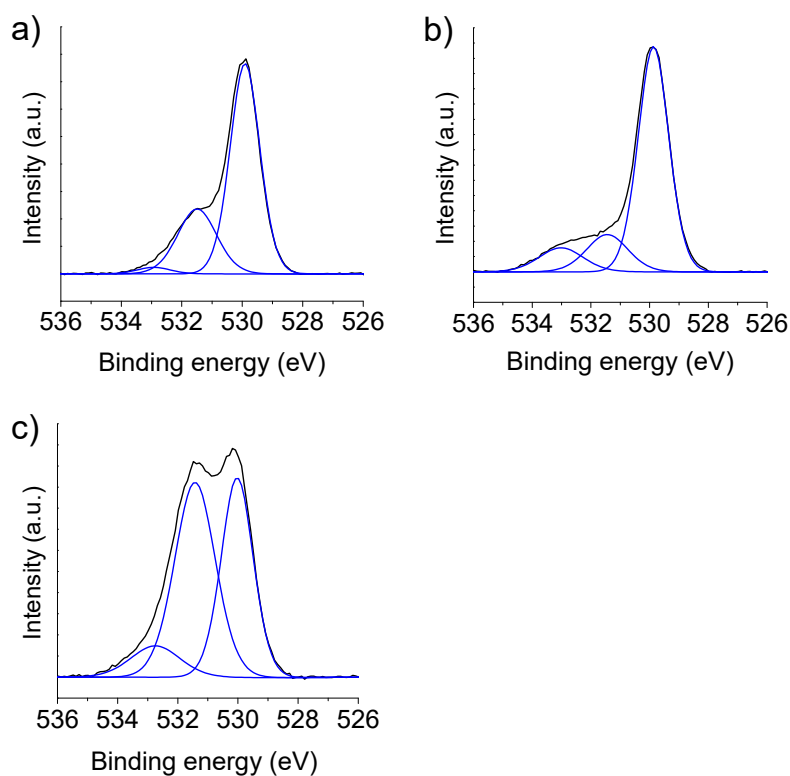

**Figure S3.** XPS deconvolution analysis of O 1s for  $\text{MgMn}_2\text{O}_4$  in different states of charge. a)  $\text{MgMn}_2\text{O}_4$  freshly prepared. b) Oxidized at 1.0 V and c) reduced at -0.7 V in 1.0 M  $\text{Mg}(\text{NO}_3)_2$  after 15 successive cycles at  $5 \text{ mV s}^{-1}$ .

**Table S2.** XPS O 1s spectral fitting parameters: binding energy (eV), area of each contribution and percentage of total area.

|                                        |                         | Mn-O-Mn | Mn-OH  | H-O-H  |
|----------------------------------------|-------------------------|---------|--------|--------|
| $\text{Mg}_{0.8}\text{Mn}_2\text{O}_4$ | O 1s peak (eV)          | 529.91  | 531.49 | 532.93 |
|                                        | Area (arb. units)       | 532.72  | 215.85 | 18.52  |
|                                        | Total area (arb. units) | 767.09  |        |        |
|                                        | Area (%)                | 69.45   | 28.14  | 2.41   |
| Oxidized spinel                        | O 1s peak (eV)          | 529.87  | 531.44 | 533.02 |
|                                        | Area (arb. units)       | 544.57  | 121.92 | 84.38  |
|                                        | Total area (arb. units) | 750.87  |        |        |
|                                        | Area (%)                | 72.52   | 16.24  | 11.24  |
| Reduced spinel                         | O 1s peak (eV)          | 530.03  | 531.43 | 532.75 |
|                                        | Area (arb. units)       | 357.46  | 442.86 | 86.17  |
|                                        | Total area (arb. units) | 886.49  |        |        |
|                                        | Area (%)                | 40.32   | 49.96  | 9.72   |

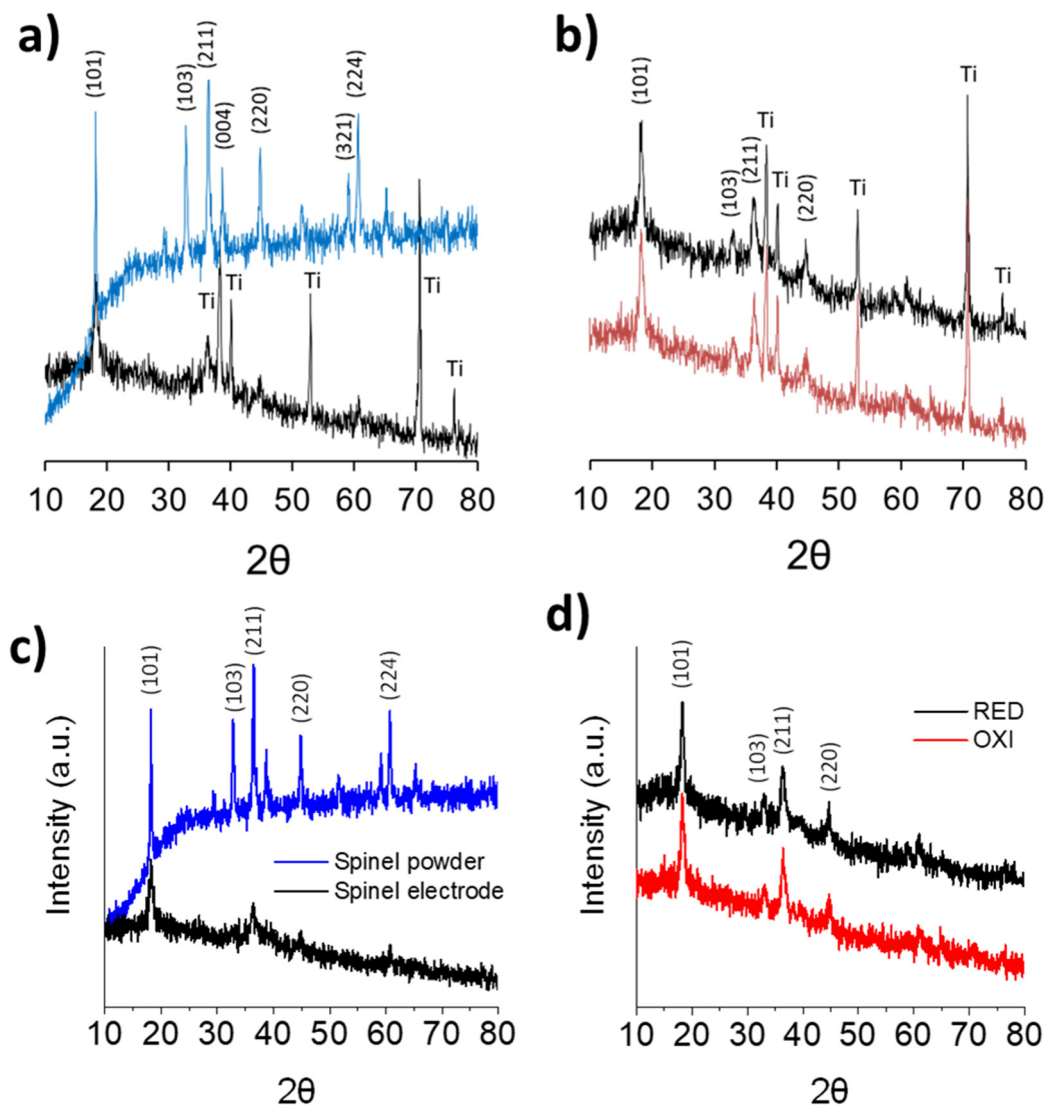

**Figure S4.** a) XRD for freshly prepared  $\text{MgMn}_2\text{O}_4$  powder (blue) and for an electrode after 15 voltammetric cycles (black). b) XRD for a reduced  $\text{MgMn}_2\text{O}_4$  electrode at -0.7 V (black) and for an oxidized electrode at 1.0 V (red) after 15 cycles (in 1.0 M  $\text{Mg}(\text{NO}_3)_2$  aqueous solution at 5  $\text{mV s}^{-1}$  and using titanium foil as a substrate). The JCPDS Card no. 00-044-1294 was employed to identify the peaks corresponding to the Ti substrate (indicated in the Figure) while the JCPDS Card no. 01-072-1336 was employed to identify tetragonal  $\text{MgMn}_2\text{O}_4$ . For clarity, Figures c) and d) show the XRD patterns after subtracting the Ti substrate contribution.

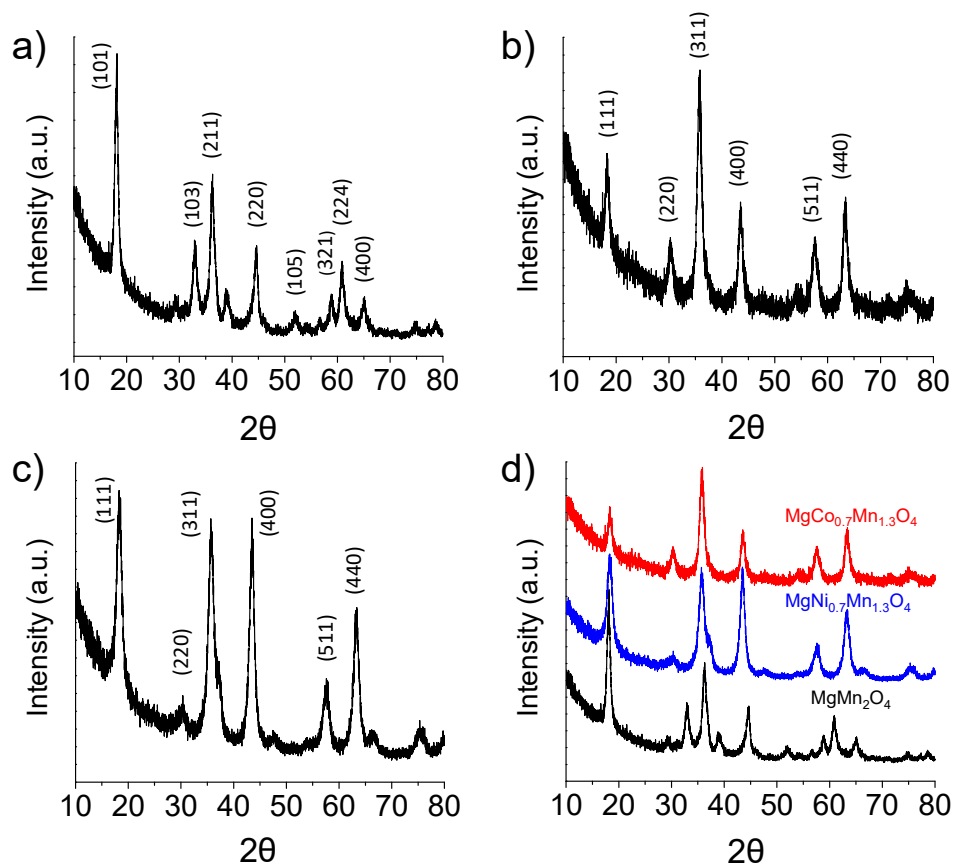

**Figure S5.** XRD patterns for powders of  $\text{MgMn}_2\text{O}_4$  (black) (a),  $\text{MgCo}_{0.7}\text{Mn}_{1.3}\text{O}_4$  (red) (b), and  $\text{MgNi}_{0.7}\text{Mn}_{1.3}\text{O}_4$  (blue) (c). For the sake of comparison, panel (d) shows the three patterns.

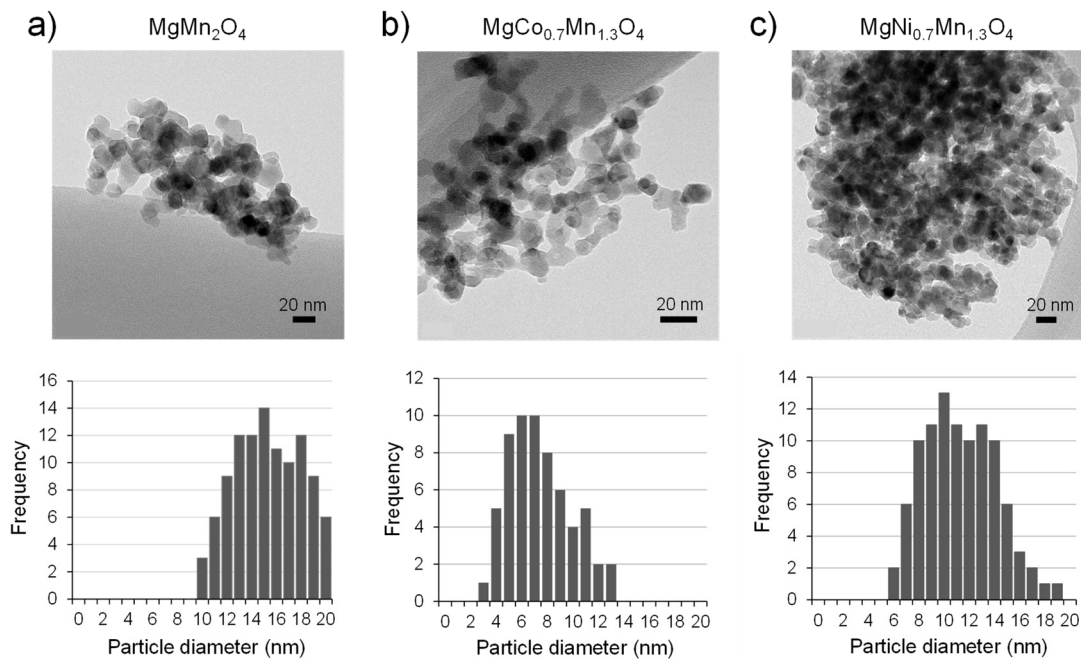

**Figure S6.** TEM images and the corresponding histograms for pristine  $\text{MgMn}_2\text{O}_4$  (a),  $\text{MgCo}_{0.7}\text{Mn}_{1.3}\text{O}_4$  (b), and  $\text{MgNi}_{0.7}\text{Mn}_{1.3}\text{O}_4$  (c) powders.

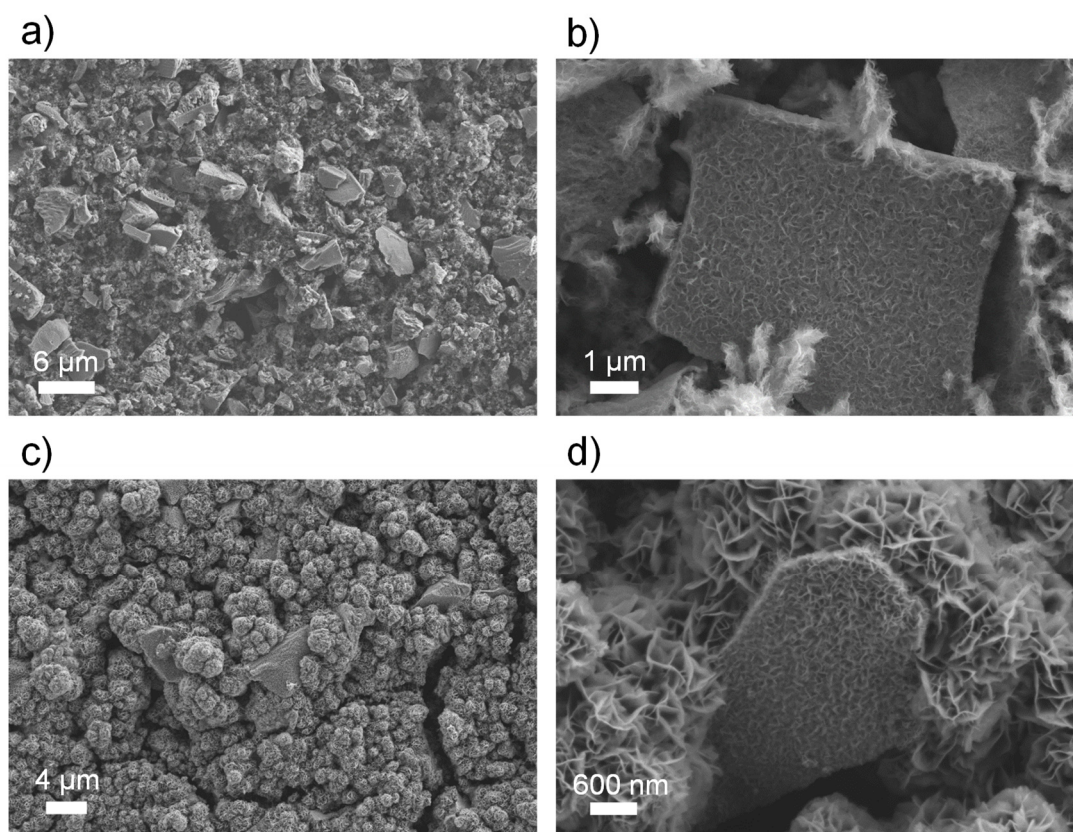

**Figure S7.** FE-SEM images for  $\text{MgCo}_{0.7}\text{Mn}_{1.3}\text{O}_4$  electrodes: (a) freshly prepared, (b) and (c) after 10 voltammetric cycles, and (d) after 120 cycles. Scan rate:  $5\ \text{mV s}^{-1}$ ; Electrolyte:  $1.0\ \text{M Mg(NO}_3)_2$ .
